# Supplementary material
Source: PubMed Central journal article supplement (PMC4155522)
Supplement: Supp_Fig1.pdf [file Supp_Fig1.pdf]

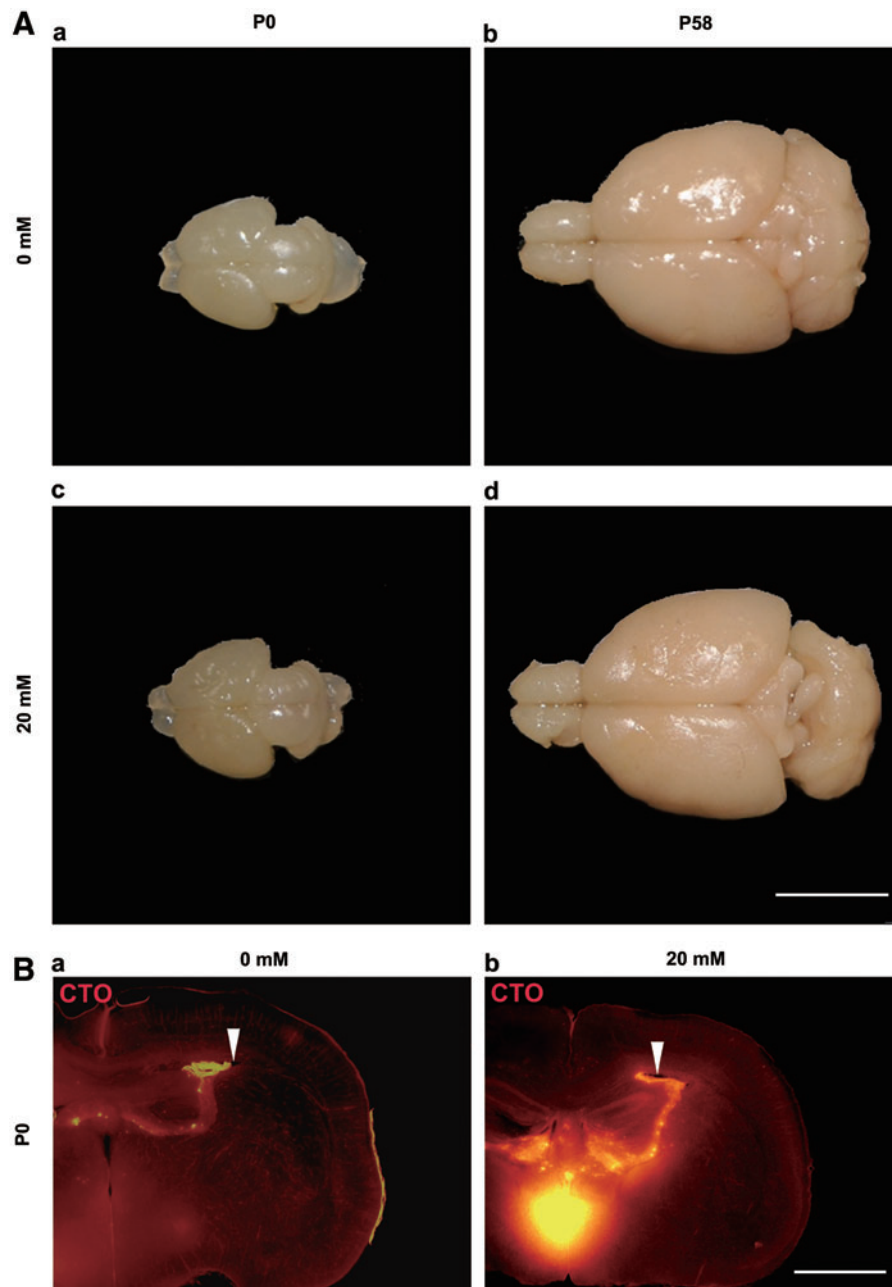

**SUPPLEMENTARY FIG. S1.** (A) Gross brain morphology at postnatal stages appears to be intact following ethylene glycol tetraacetic acid (EGTA) treatment during the embryonic period. Buffer (a, b) or 20 mM EGTA solution (c, d) was injected into the lateral ventricle of E14.5 mice and the animals were sacrificed after birth at P0 (a, c) or P58 (b, d). Scale bar=5 mm. (B) Injections of EGTA solution into the ventricles are confirmed by the presence of residual vital dye in the cortex. (a, b) Brain sections at P0 correspond to Figure 1D-b and d. Red, Cell Tracker Orange (CTO), which was injected with EGTA into the cortical ventricle (arrowheads) at E14.5. Scale bar=1 mm.
