# Supplementary material
Source: PubMed Central journal article supplement (PMC4155522)
Supplement: Supp_Fig2.pdf [file Supp_Fig2.pdf]

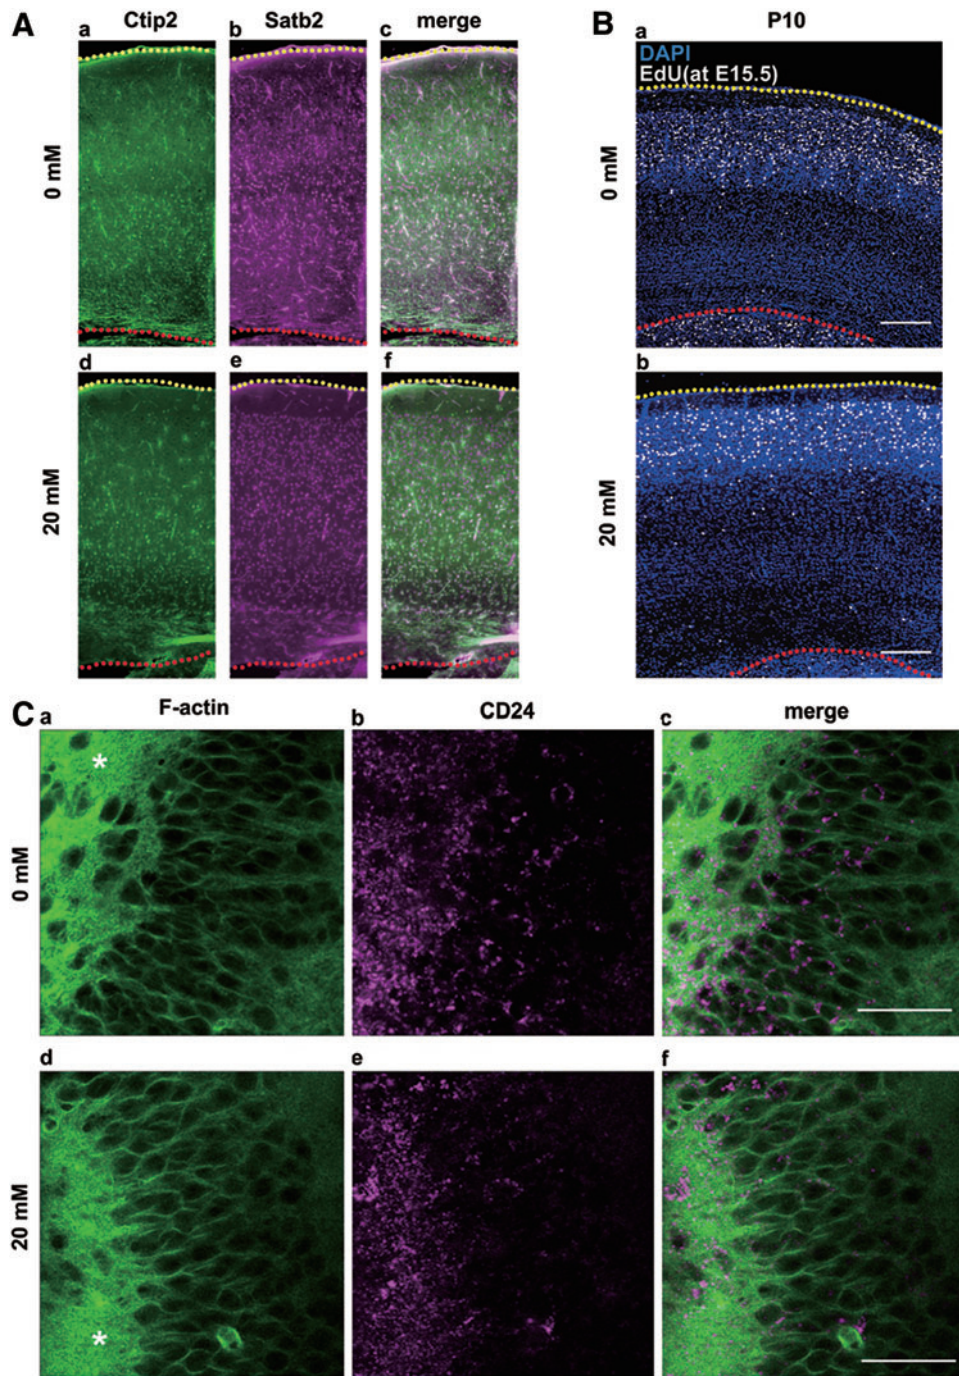

**SUPPLEMENTARY FIG. S2.** (A) Both deeper and upper layers of the dorsal cortex develop normally after 20 mM EGTA injection. Sections of P10 brain immunostained with Ctip2 (**a, d; c, f, green**) and Satb2 (**b, e; c, f, magenta**) (a deeper and upper layer marker, respectively) after injection of 0 (**a–c**) or 20 mM (**d–f**) EGTA solution into the lateral ventricle of E14.5 mice. (B) Birthdating analysis revealed that newborn neurons migrate normally after EGTA treatment. Incorporation of EdU, which was introduced 1 day after injection of 0 (**a**) or 20 mM (**b**) EGTA solution into the lateral ventricle of E14.5 mice, was detected in the dorsal cortex at P10. Blue, DNA. White, EdU. Scale bars = 200  $\mu$ m. (C) Ependymal cells at the ventricular surface that surround the lateral ventricle postnatally following injection of EGTA solution during embryonic development. En-face views of the surface of the lateral ventricle at P10 after injection of 0 (**a–c**) or 20 (**d–f**) mM EGTA at E14.5. The surface structures, including actin organization (*asterisks* in **a, d**) and localization of CD24, a marker of ependymal cells, are essentially identical in both cases. Green, F-actin. Magenta, CD24. Scale bars = 40  $\mu$ m. Red and yellow dots: the apical surface and the basal pial surface, respectively.
