# Supplementary material
Source: PubMed Central journal article supplement (PMC4155522)
Supplement: Supp_Fig4.pdf [file Supp_Fig4.pdf]

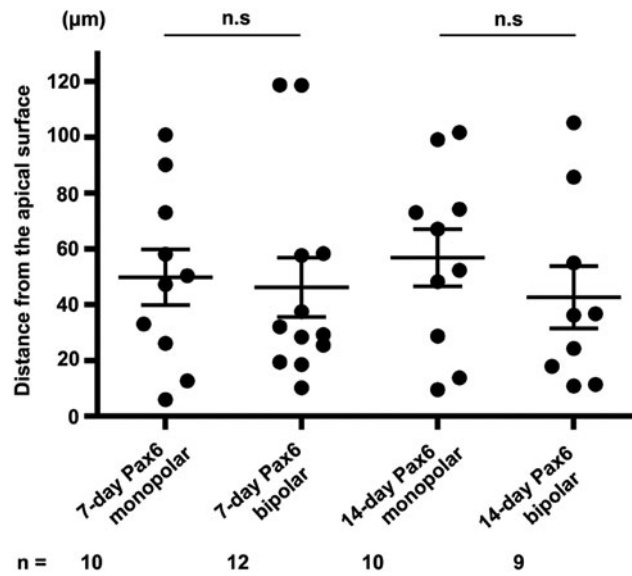

**SUPPLEMENTARY FIG. S4.** Positions of Pax6-positive grafted cells in the host brain tissue. Quantification of the distance of grafted cells with one or two processes from the apical surface following 7 or 14 days of neural induction from ESCs. The number of Pax6-positive grafted cells in each category is indicated (*n*).
