# Supplementary material
Source: PubMed Central journal article supplement (PMC4155522)
Supplement: Supp_Fig6.pdf [file Supp_Fig6.pdf]

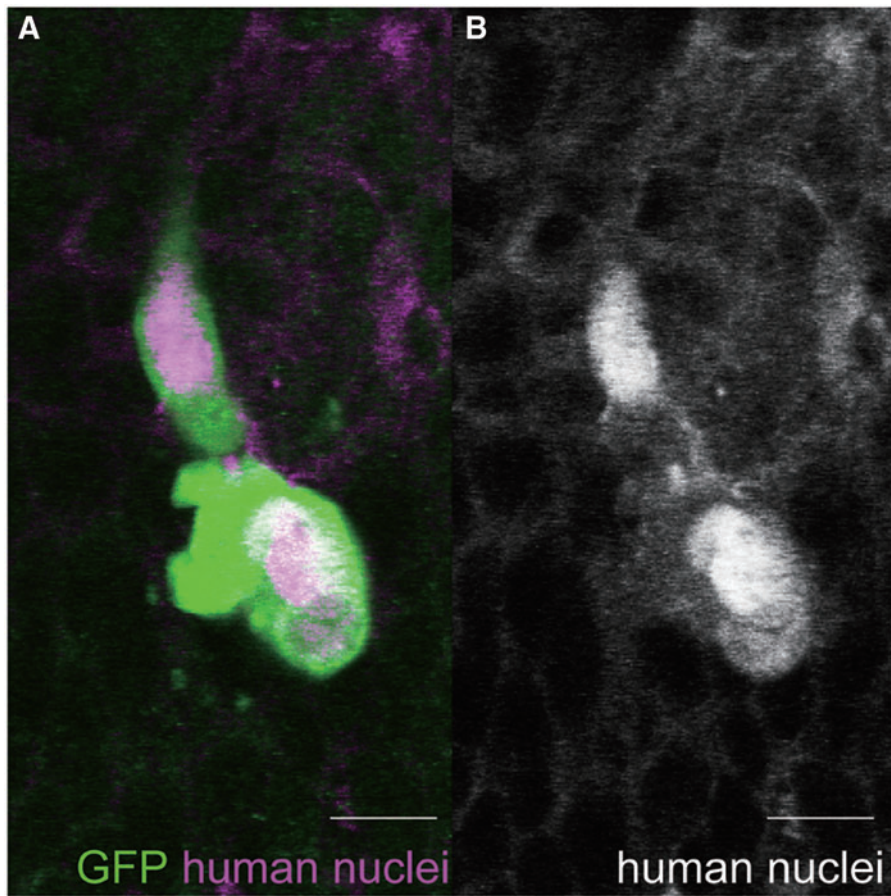

**SUPPLEMENTARY FIG. S6.** Transplanted human-ESC-derived cells are specifically marked with the anti-all-human nuclei antibody. Grafted human-ESC-derived cells (**A**; *green*) 1 day after grafting (E15.5) are labeled with the anti-all-human nuclei antibody (**A**; *magenta* and **B**). GFP-expressing cells are exclusively stained with the anti-human nuclei antibody. Scale bars = 10  $\mu$ m.
